# Supplementary material
Source: ML conference proceedings conference paper supplement (https://openreview.net/forum?id=l8zRnvD95l)
Supplement: supplementary_material [file attachment]

# CarbonSense Data Card

| CarbonSense                                            | Dataset Summary                                                                                                                                                                                                                                                                                                                              |
|--------------------------------------------------------|----------------------------------------------------------------------------------------------------------------------------------------------------------------------------------------------------------------------------------------------------------------------------------------------------------------------------------------------|
| <b>This doc:</b> <a href="#">GitHub Link</a>           | This data card describes CarbonSense, a multimodal dataset for carbon flux modelling.                                                                                                                                                                                                                                                        |
| <b>Dataset:</b> <a href="#">Zenodo Link</a>            | CarbonSense integrates biophysical data collected from field observation towers with satellite imagery of the surrounding geography. The primary use for CarbonSense is to use the data to predict a carbon flux value for that area at a given time, indicating how much carbon is being absorbed or released by the surrounding ecosystem. |
| <b>Data Pipeline Code:</b> <a href="#">GitHub Link</a> |                                                                                                                                                                                                                                                                                                                                              |
| <b>Data Card Author:</b> Matthew Fortier               |                                                                                                                                                                                                                                                                                                                                              |
| <b>Correspondence:</b> matthew.fortier@mila.quebec     |                                                                                                                                                                                                                                                                                                                                              |

| Dataset Authors                |                                                 |                                                                             |
|--------------------------------|-------------------------------------------------|-----------------------------------------------------------------------------|
| Author                         | Affiliation(s)                                  | Funding                                                                     |
| Matthew Fortier (Owner)        | Mila Quebec AI Institute Polytechnique Montréal | IVADO AI, Biodiversity and Climate Change Initiative <a href="#">[link]</a> |
| Mats L. Richter (Contributor)  | ServiceNow                                      |                                                                             |
| Oliver Sonnentag (Contributor) | Université de Montréal                          |                                                                             |
| Chris Pal (Contributor)        | Mila Quebec AI Institute Polytechnique Montréal |                                                                             |

| Dataset Snapshot              |                                        |
|-------------------------------|----------------------------------------|
| Data modality                 | Multimodal (tabular, image)            |
| Size of dataset               | 12.4 GB                                |
| Number of instances           | 26,973,576                             |
| Number of fields per instance | 36 [30 predictors + 5 targets + index] |

## Motivations & Use

|                                                                                                                                                                                                                                                                                                                                                                                    |                                                                                                                    |                                                                                                                                                                                                                                                                                   |                                                                                                                                                                                         |
|------------------------------------------------------------------------------------------------------------------------------------------------------------------------------------------------------------------------------------------------------------------------------------------------------------------------------------------------------------------------------------|--------------------------------------------------------------------------------------------------------------------|-----------------------------------------------------------------------------------------------------------------------------------------------------------------------------------------------------------------------------------------------------------------------------------|-----------------------------------------------------------------------------------------------------------------------------------------------------------------------------------------|
| <b>Key Domain Applications</b><br><br>Machine Learning,<br>Deep Learning,<br>Multimodal Learning,<br>Carbon Dynamics,<br>Climate Change                                                                                                                                                                                                                                            | <b>Motivating Factors</b><br><br>Providing a shared dataset for deep learning research into carbon flux modelling. | <b>Intended Use</b><br><br>Safe for research use. Production use should be approached with caution due to data imbalances.                                                                                                                                                        | <b>License</b><br><br>CarbonSense is provided under Creative Commons 4.0 license, meaning anyone is free to remix, adapt, and redistribute given proper attribution, even commercially. |
| <b>Citation</b><br><br><pre>@misc{fortier2024carbonsense,<br/>  title={CarbonSense: A Multimodal Dataset<br/>        and Baseline for Carbon Flux Modelling},<br/>  author={Matthew Fortier and Mats L. Richter<br/>        and Oliver Sonnentag and Chris Pal},<br/>  year={2024},<br/>  eprint={2406.04940},<br/>  archivePrefix={arXiv},<br/>  primaryClass={cs.LG}<br/>}</pre> |                                                                                                                    | <b>Access and Maintenance</b><br><br>CarbonSense is open access and can be downloaded from Zenodo <a href="#">here</a> .<br><br>Zenodo is a CERN-funded initiative with a <a href="#">robust longevity plan</a> . The data will be available and versioned for at least 20 years. |                                                                                                                                                                                         |

## Dataset Structure

|                            |                                                                                                                                                                                                                                     |
|----------------------------|-------------------------------------------------------------------------------------------------------------------------------------------------------------------------------------------------------------------------------------|
| <b>Overview</b>            | Dataset is divided into geographic sites (385 total). Each site will have one or more observation windows (ex: 2005-01-01_2016-12-31). Each observation window will have four resources: metadata, predictors, images, and targets. |
| <b>Directory Structure</b> | {site}/{window}/{resource}                                                                                                                                                                                                          |
| <b>Example File Path</b>   | CA-LP1/2007-01-01_2020-12-13/targets.csv                                                                                                                                                                                            |
| <b>Resources</b>           |                                                                                                                                                                                                                                     |
| <b>meta.json</b>           | Contains site metadata such as ecosystem type and geographic location                                                                                                                                                               |
| <b>predictors.csv</b>      | Meteorological and environmental variables at hourly intervals - also referred to as eddy covariance (EC) data                                                                                                                      |
| <b>targets.csv</b>         | Carbon fluxes at hourly intervals                                                                                                                                                                                                   |
| <b>modis.pkl</b>           | Satellite data of surrounding area at daily intervals - also referred to as MODIS data                                                                                                                                              |

## Dataset Fields

| Resource       | Field     | Description                                 | Type   | Null ratio |
|----------------|-----------|---------------------------------------------|--------|------------|
| predictors.csv | timestamp | Pandas datetime object used for indexing    | string | 0.000      |
|                | DOY       | Day of year                                 | float  | 0.000      |
|                | TOD       | Time of day                                 | float  | 0.000      |
|                | TA_F      | Air temperature                             | float  | 0.115      |
|                | SW_IN_F   | Incoming shortwave radiation                | float  | 0.123      |
|                | LW_IN_F   | Incoming longwave radiation                 | float  | 0.387      |
|                | VPD_F     | Vapor pressure deficit                      | float  | 0.147      |
|                | PA_F      | Air pressure                                | float  | 0.264      |
|                | P_F       | Precipitation                               | float  | 0.263      |
|                | WS_F      | Wind speed                                  | float  | 0.193      |
|                | WD        | Wind direction                              | float  | 0.190      |
|                | RH        | Relative humidity                           | float  | 0.166      |
|                | USTAR     | Wind friction velocity                      | float  | 0.228      |
|                | NETRAD    | Net radiation                               | float  | 0.241      |
|                | PPFD_IN   | Incoming photosynthetic photon flux density | float  | 0.262      |
|                | PPFD_OUT  | Outgoing photosynthetic photon flux density | float  | 0.584      |
|                | SW_OUT    | Outgoing shortwave radiation                | float  | 0.351      |
|                | LW_OUT    | Outgoing longwave radiation                 | float  | 0.431      |
|                | CO2_F_MDS | CO2 concentration                           | float  | 0.185      |
|                | G_F_MDS   | Soil heat flux                              | float  | 0.371      |
|                | LE_F_MDS  | Latent heat flux                            | float  | 0.178      |
|                | H_F_MDS   | Sensible heat flux                          | float  | 0.159      |

|             |                 |                                                              |        |       |
|-------------|-----------------|--------------------------------------------------------------|--------|-------|
| targets.csv | timestamp       | Pandas datetime object used for indexing                     | string | 0.000 |
|             | NEE_VUT_REF     | Net ecosystem exchange                                       | float  | 0.230 |
|             | GPP_DT_VUT_REF  | Gross primary production, daytime partition                  | float  | 0.040 |
|             | GPP_NT_VUT_REF  | Gross primary production, nighttime partition                | float  | 0.039 |
|             | RECO_DT_VUT_REF | Ecosystem respiration, daytime partition                     | float  | 0.040 |
|             | RECO_NT_VUT_REF | Ecosystem respiration, nighttime partition                   | float  | 0.039 |
| meta.json   | SITE_ID         | Eddy covariance (EC) station site identifier                 | string | 0.000 |
|             | LOCATION_LAT    | EC station latitude                                          | float  | 0.000 |
|             | LOCATION_LON    | EC station longitude                                         | float  | 0.000 |
|             | LOCATION_ELEV   | EC station elevation above sea level                         | float  | 0.136 |
|             | IGBP            | IGBP land cover type (ecosystem class)                       | string | 0.000 |
|             | SOURCES         | Source datasets used for this site, comma-separated          | string | 0.000 |
|             | TIME            | Temporal window covered by data                              | list   | 0.000 |
| modis.pkl   | TIMESTAMP*      | Pandas datetime object used as key value for indexing images | string | N/A   |
|             | dim0**          | MCD43A4 Band 1                                               | array  | N/A   |
|             | dim1**          | MCD43A4 Band 2                                               | array  | N/A   |
|             | dim2**          | MCD43A4 Band 3                                               | array  | N/A   |
|             | dim3**          | MCD43A4 Band 4                                               | array  | N/A   |
|             | dim4**          | MCD43A4 Band 5                                               | array  | N/A   |
|             | dim5**          | MCD43A4 Band 6                                               | array  | N/A   |
|             | dim6**          | MCD43A4 Band 7                                               | array  | N/A   |

|                                                                                                                                                                                                                                                                                                                                                                                                              |        |                |       |     |
|--------------------------------------------------------------------------------------------------------------------------------------------------------------------------------------------------------------------------------------------------------------------------------------------------------------------------------------------------------------------------------------------------------------|--------|----------------|-------|-----|
|                                                                                                                                                                                                                                                                                                                                                                                                              | dim7** | MCD43A2 Band 1 | array | N/A |
|                                                                                                                                                                                                                                                                                                                                                                                                              | dim8** | MCD43A2 Band 2 | array | N/A |
| <p>* The modis.pkl resource contains a dictionary of key-value pairs. The keys are timestamps corresponding to satellite observations, typically once per day. As such, there are no inherently null values; if a satellite image is not present at a given time, there will simply be no key for it</p> <p>** The values of the dictionary are 9-channel satellite images of the associated EC station.</p> |        |                |       |     |

## Data Collection & Processing

### Eddy Covariance Data

#### Overview

Eddy covariance (EC) data is the tabular data used in CarbonSense. It is made up of environmental and meteorological predictors, as well as carbon flux targets.

#### Collection

Raw data was aggregated from existing datasets:

- [FLUXNET 2015](#)
- [Ameriflux](#)
- [ICOS 2023](#)
- [ICOS WW](#)

These regional flux networks release data at various intervals; ICOS releases updated datasets multiple times per year, FLUXNET still has not released a second version since 2020.

The criteria for inclusion are data sources which use the ONEFlux processing pipeline; this ensures consistent variables and units across EC stations.

**Collection Cadence:** Static  
**Collection Date:** 2024-03-01

#### Processing

- Hourly data extracted from releases. Half-hourly data downsampled to hourly
- Relevant columns extracted (all columns in *predictors.csv* and *targets.csv* above)
  - Corresponding quality check columns also kept
- Sentinel missing values deleted
- Data from source collections fused and partitioned by EC station
  - Stations present in multiple sources are combined, favouring values from more recent release in the event of collisions
  - Each station will have one or more subdirectories of contiguous data coverage. Separating by contiguity makes data easier to handle for time series modelling. Example:

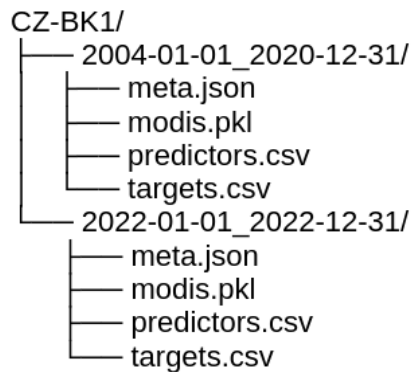

- EC station geography and temporal coverage extracted, used as metadata for satellite data collection
- Min-max normalization procedure
  - Min/max values were determined for each variable
    - Examples
      - Day of year [0, 366]
      - Air temperature [-80, 80] (degrees celsius)
      - Wind speed [0, 100] (meters per second)
    - These were chosen by objective bounds, or by generous feasible bounds based on historical extremes (for example, highest recorded wind speed is 103 m/s)
  - Variables were mapped from min-max values to [-1, 1) for cyclic variables, and [-0.5, 0.5) for acyclic variables
    - Cyclic variables are like wind direction and time of day, where the maximum and minimum values are identical
    - This distinction makes it easy for models to understand the variables under Fourier feature encoding, which our baseline model uses
    - Our data pipeline allows for compiling CarbonSense without these distinctions via config file
- Data filtering
  - Quality check flags are used to identify gap-filled data points
  - Data with a quality check greater than or equal to 2 (“moderate confidence gapfilling”) are discarded
    - The threshold for this procedure can be controlled with the pipeline config file
  - Quality check flags are then removed
- Data are then split into *predictors.csv* and *targets.csv* files, with all carbon flux values going into *targets.csv*. Timestamp variable remains in both files for indexing purposes.
- Site metadata are placed in individual *meta.json* files and stored alongside predictors and targets.

## Satellite Data

### Overview

CarbonSense uses Moderate Resolution Imaging Spectroradiometer (MODIS) satellite data products. The [MCD43A4](#) and [MCD43A2](#) are the only products in use in v1.0.0 of the dataset.

### Collection

Satellite data was acquired through Google Earth Engine (GEE). A [notebook](#) in the GitHub repository is used to access GEE through Google Colab.

**Collection Cadence:** Static  
**Collection Date:** 2024-03-01

### Processing

- Metadata generated from EC data pipeline is used to specify location / time of satellite data to GEE
- 7 reflectance bands are used from MCD43A4; the rest are discarded
- 2 bands (water and snow cover) are used from MCD43A2; the rest are discarded
- MCD43A4 data is cleaned and normalized
  - Reflectance values in MCD43A4 range from 0 to 10,000 with a fill value of 32767
  - We map [0, 10000) -> [0, 1.0) and change fill values from (32767) -> (-1)
    - This makes it relatively easy for ingestion by neural network
- MCD43A2 data is cleaned
  - Both bands contain categorical data
  - Snow cover band
    - 1 = snow, 0 = no snow
    - 255 = fill value -> we remap to -1
  - Water cover band
    - Shallow ocean, shallow inland water, ephemeral water, deep inland water, moderate or continental ocean, deep ocean -> mapped to 1 ('water')
    - Land, ocean coastlines and lake shorelines -> mapped to 0 ('no water')
    - 255 = fill value -> we remap to 0 (treated as 'no water' for simplicity, this is essentially just median gap filling as the vast majority of pixels are 'no water')
- MCD43A2 is stacked on top of MCD43A4 so that band 8 is snow, and band 9 is water
- Images with > 50% fill values are discarded
- Images are placed in dictionaries with the image timestamp being the key. These dictionaries are written as binary files labelled *modis.pkl* alongside EC data files.
